# Supplementary material
Source: publisher site journal article supplement (https://www.dovepress.com/get_supplementary_file.php?f=485612.xlsx)
Supplement: Supplementary file 1 [file get_supplementary_file.php]

## Sheet: Sheet1
Gene	conMean	treatMean	pvalue	Type
FTH1	12.208	12.4333	0.0325444	Up
DUOX2	3.60647	3.48633	0.0172882	Down
TP53	7.03768	6.74579	0.0244677	Down
LPCAT3	5.83149	5.61373	0.00321093	Down
KRAS	6.90662	7.06033	0.0459542	Up
ACO1	5.45374	5.36744	0.0482966	Down
EGFR	4.84202	4.9371	0.0195368	Up
ELAVL1	6.33333	6.2416	0.0265333	Down
HILPDA	5.5721	5.38585	0.0263291	Down
ATF3	6.05589	6.68113	0.0490903	Up
MIOX	5.27531	5.17518	0.0325933	Down
PEX12	5.51388	5.19184	0.0121656	Down
MMD	7.63681	8.03373	0.0490903	Up
MDM2	4.56587	4.49521	0.0167424	Down
DLD	8.22345	8.1097	0.0315091	Down
MAP3K14	7.16832	7.30984	0.0131944	Up
DDR2	4.31375	4.38337	0.0397918	Up
TRIM46	4.71252	4.84287	0.00948361	Up
DPEP1	5.26763	5.41355	0.0284402	Up
SLC7A11	3.54025	3.44613	0.00162444	Down
COX4I2	5.87616	5.98853	0.0385059	Up
METTL14	5.99069	5.7992	0.00871188	Down
MUC1	5.50327	5.60184	0.00671501	Up
PML	5.91949	5.81611	0.0283084	Down
JUN	7.48769	8.89318	0.00655467	Up
CA9	5.42522	5.61376	0.00129097	Up
ZFP36	11.7203	12.497	0.0109584	Up
HCAR1	3.32054	3.48712	0.0071108	Up
NR5A2	2.95734	2.90937	0.0283084	Down
PANX2	5.66401	5.78327	0.000535035	Up
PPARA	4.85038	4.73915	0.0112068	Down
SIAH2	8.57357	8.93834	0.0071108	Up
PRDX1	10.4391	10.2011	0.0143547	Down
PARP8	8.99705	9.23382	0.0263291	Up
PARP12	8.98223	8.81632	0.0283084	Down
SENP1	6.09609	5.96694	0.0167424	Down
